# Supplementary material for: Encapsulation of ginger oleoresin in co-crystallized sucrose: development, characterization and storage stability
Source: Royal Society of Chemistry journal article supplement (doi:10.1039/d1fo00565k), 2021-01-01
Supplement: d1fo00565k1.pdf [file d1fo00565k1.pdf]

(a)

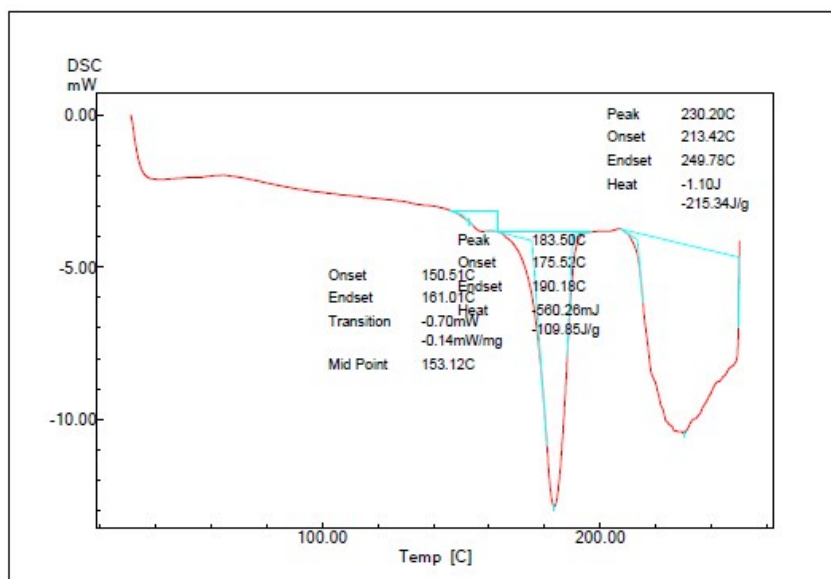

(b)

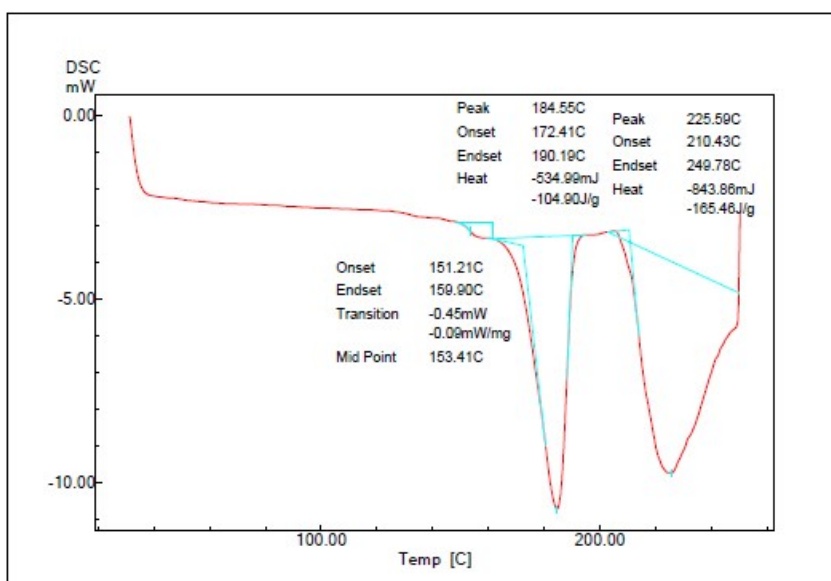

(c)

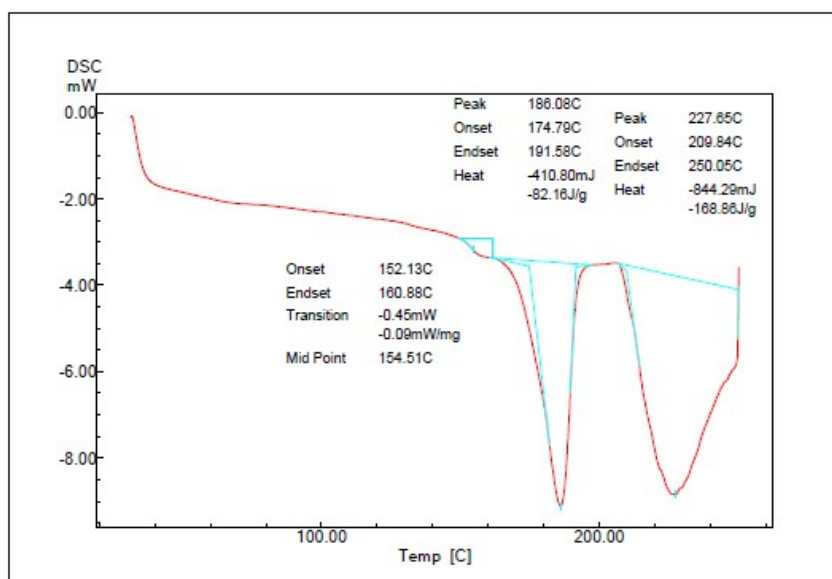

(d)

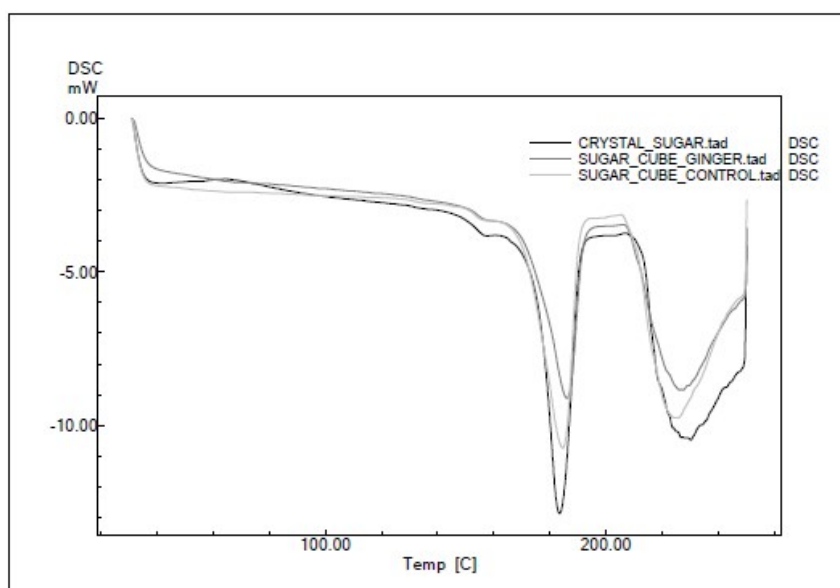

**Fig. S1.** DSC endotherms of (a) crystal sugar, (b) co-crystallized sugar cube without ginger oleoresin, (c) co-crystallized sugar cubes with ginger oleoresin, (d) overlay of the endotherms.

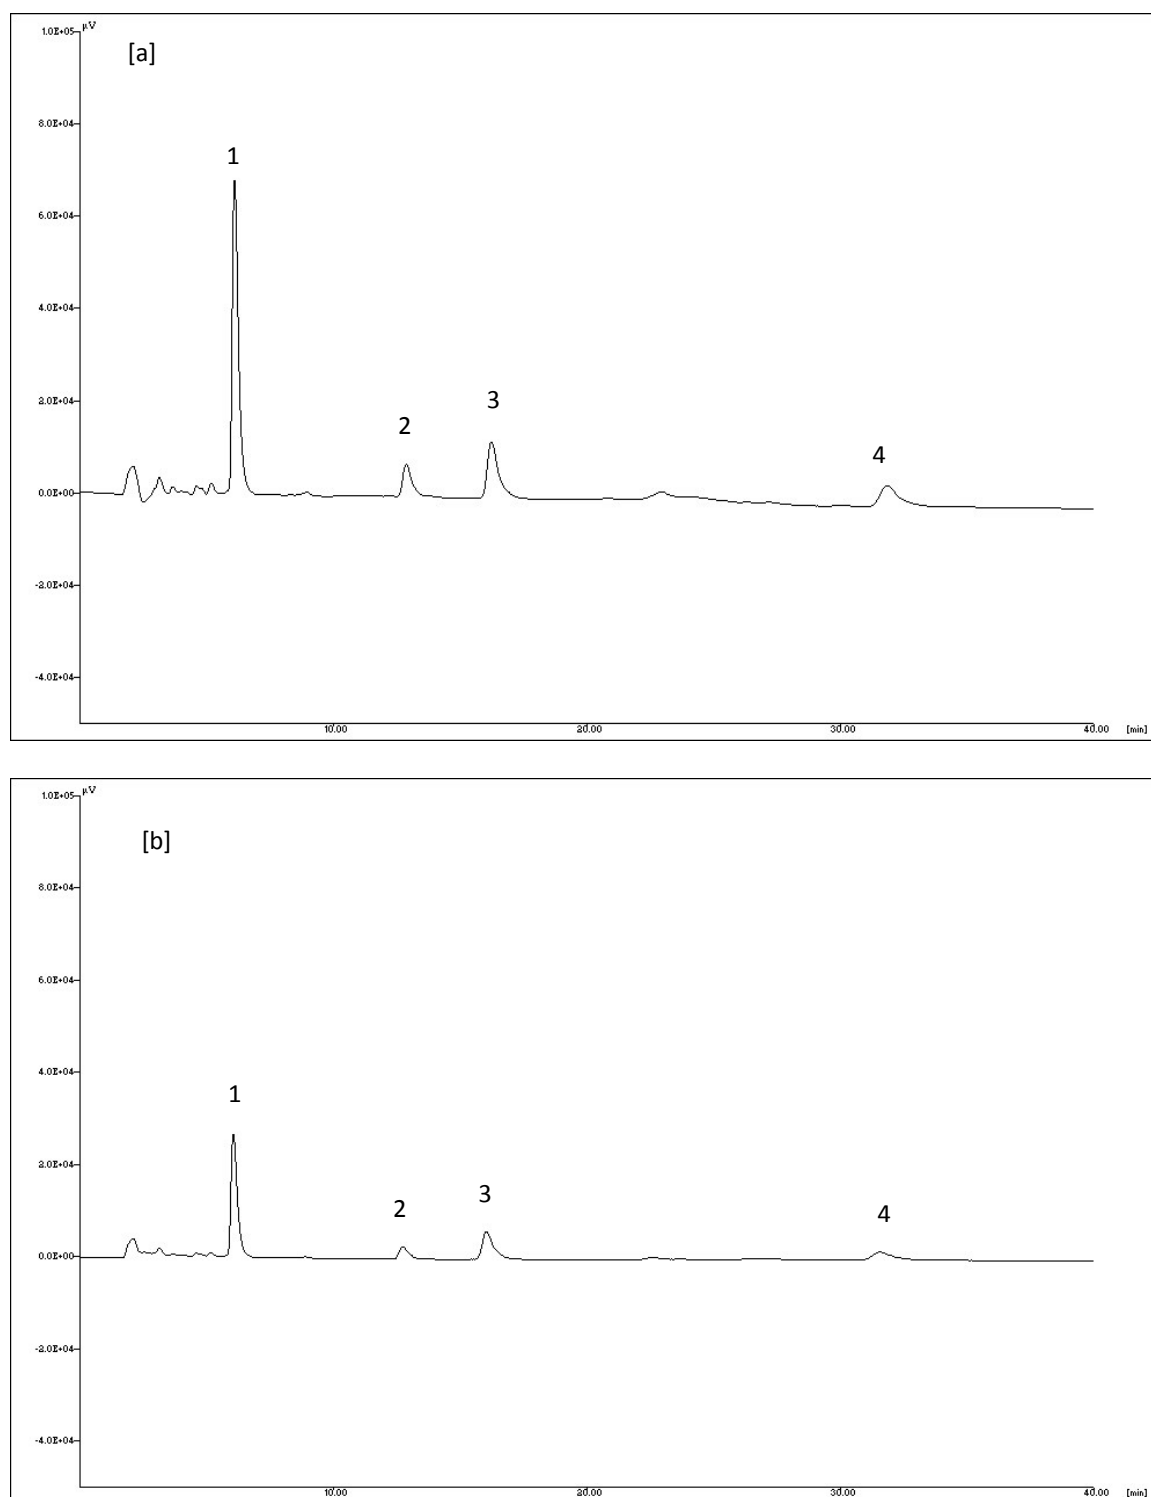

**Fig. S2.** HPLC chromatogram of ginger oleoresin (a) before and (b) after incorporation in sugar cubes for calculation of encapsulation efficiency; 1, 2, 3 and 4 are peaks denoting [6]-gingerol, [8]-gingerol, [10]-gingerol, and [6]-shogaol, respectively.

**Table S1.** Degradation of [6], [8], [10]-gingerols and formation of [6]-shogoal in ginger flavoured co-crystallized sugar cubes under storage of 33% RH at 25 °C determined by HPLC

| Storage time (days) | [6]-Gingerol (mg/100g)     | [8]-Gingerol (mg/100g)    | [10]-Gingerol (mg/100g)   | [6]-Shogoal (mg/100g)     |
|---------------------|----------------------------|---------------------------|---------------------------|---------------------------|
| 0                   | 45.57 ± 1.23 <sup>a</sup>  | 7.13 ± 1.70 <sup>a</sup>  | 7.78 ± 1.64 <sup>a</sup>  | 3.88 ± 0.64 <sup>d</sup>  |
| 15                  | 42.61 ± 0.59 <sup>ab</sup> | 6.26 ± 0.00 <sup>ab</sup> | 6.97 ± 0.01 <sup>a</sup>  | 5.95 ± 0.04 <sup>c</sup>  |
| 30                  | 40.90 ± 1.05 <sup>b</sup>  | 6.12 ± 0.52 <sup>ab</sup> | 5.10 ± 0.41 <sup>b</sup>  | 6.44 ± 0.74 <sup>c</sup>  |
| 45                  | 36.88 ± 2.11 <sup>c</sup>  | 5.50 ± 0.52 <sup>bc</sup> | 4.67 ± 1.42 <sup>bc</sup> | 8.09 ± 0.12 <sup>b</sup>  |
| 60                  | 36.20 ± 0.52 <sup>c</sup>  | 5.25 ± 0.15 <sup>bc</sup> | 3.64 ± 0.26 <sup>bc</sup> | 9.12 ± 0.00 <sup>ab</sup> |
| 75                  | 34.74 ± 3.69 <sup>c</sup>  | 4.32 ± 0.33 <sup>cd</sup> | 3.27 ± 0.25 <sup>c</sup>  | 9.36 ± 1.51 <sup>a</sup>  |
| 90                  | 30.83 ± 0.66 <sup>d</sup>  | 3.44 ± 0.14 <sup>d</sup>  | 1.77 ± 0.32 <sup>d</sup>  | 9.60 ± 0.09 <sup>a</sup>  |

Values in same column with different letters are significantly different (P≤0.05).

**Table S2.** Degradation of [6], [8], [10]-gingerols and formation of [6]-shogoal in ginger flavoured co-crystallized sugar cubes under storage of 63% RH at 25 °C determined by HPLC

| <b>Storage time<br/>(days)</b> | <b>[6]-Gingerol<br/>(mg/100g)</b> | <b>[8]-Gingerol<br/>(mg/100g)</b> | <b>[10]-Gingerol<br/>(mg/100g)</b> | <b>[6]-Shogoal<br/>(mg/100g)</b> |
|--------------------------------|-----------------------------------|-----------------------------------|------------------------------------|----------------------------------|
| <b>0</b>                       | 45.57 ± 1.23 <sup>a</sup>         | 7.13 ± 1.70 <sup>a</sup>          | 7.78 ± 1.64 <sup>a</sup>           | 3.88 ± 0.64 <sup>e</sup>         |
| <b>15</b>                      | 43.23 ± 1.20 <sup>b</sup>         | 7.01 ± 0.16 <sup>a</sup>          | 7.32 ± 0.27 <sup>a</sup>           | 5.83 ± 0.28 <sup>d</sup>         |
| <b>30</b>                      | 42.70 ± 0.71 <sup>b</sup>         | 6.57 ± 0.10 <sup>a</sup>          | 6.65 ± 0.57 <sup>a</sup>           | 6.44 ± 0.74 <sup>cd</sup>        |
| <b>45</b>                      | 42.13 ± 0.55 <sup>b</sup>         | 5.25 ± 0.32 <sup>b</sup>          | 4.14 ± 0.81 <sup>b</sup>           | 6.78 ± 0.17 <sup>c</sup>         |
| <b>60</b>                      | 35.64 ± 0.49 <sup>c</sup>         | 4.64 ± 0.16 <sup>b</sup>          | 3.27 ± 0.41 <sup>b</sup>           | 7.80 ± 0.44 <sup>b</sup>         |
| <b>75</b>                      | 33.80 ± 0.9 <sup>d</sup>          | 4.34 ± 0.85 <sup>b</sup>          | 3.26 ± 0.14 <sup>b</sup>           | 9.99 ± 0.21 <sup>a</sup>         |
| <b>90</b>                      | 25.89 ± 0.27 <sup>e</sup>         | 3.85 ± 0.31 <sup>b</sup>          | 3.25 ± 0.40 <sup>b</sup>           | 10.28 ± 0.30 <sup>a</sup>        |

Values in same column with different letters are significantly different (P≤0.05).

**Table S3.** Degradation of [6], [8], [10]-gingerols and formation of [6]-shogoal in ginger flavoured co-crystallized sugar cubes under storage of 93% RH at 25 °C determined by HPLC

| <b>Storage time<br/>(days)</b> | <b>[6]-Gingerol<br/>(mg/100 g)</b> | <b>[8]-Gingerol<br/>(mg/100 g)</b> | <b>[10]-Gingerol<br/>(mg/100 g)</b> | <b>[6]-Shogoal<br/>(mg/100 g)</b> |
|--------------------------------|------------------------------------|------------------------------------|-------------------------------------|-----------------------------------|
| <b>0</b>                       | 45.57 ± 1.23 <sup>a</sup>          | 7.13 ± 1.70 <sup>a</sup>           | 7.78 ± 1.64 <sup>a</sup>            | 3.88 ± 0.64 <sup>d</sup>          |
| <b>15</b>                      | 43.23 ± 10.13 <sup>a</sup>         | 6.80 ± 0.05 <sup>a</sup>           | 6.03 ± 0.82 <sup>b</sup>            | 5.18 ± 0.08 <sup>cd</sup>         |
| <b>30</b>                      | 43.12 ± 1.97 <sup>a</sup>          | 6.71 ± 0.16 <sup>a</sup>           | 5.39 ± 0.79 <sup>bc</sup>           | 6.20 ± 1.46 <sup>c</sup>          |
| <b>45</b>                      | 39.04 ± 0.55 <sup>a</sup>          | 5.20 ± 0.38 <sup>b</sup>           | 4.30 ± 1.09 <sup>cd</sup>           | 6.44 ± 0.74 <sup>c</sup>          |
| <b>60</b>                      | 38.42 ± 0.04 <sup>a</sup>          | 4.52 ± 0.26 <sup>bc</sup>          | 3.49 ± 0.04 <sup>de</sup>           | 8.05 ± 0.44 <sup>b</sup>          |
| <b>75</b>                      | 29.97 ± 0.99 <sup>b</sup>          | 4.43 ± 0.15 <sup>bc</sup>          | 2.68 ± 0.89 <sup>de</sup>           | 9.98 ± 0.76 <sup>a</sup>          |
| <b>90</b>                      | 27.33 ± 0.39 <sup>b</sup>          | 3.25 ± 0.67 <sup>d</sup>           | 1.98 ± 0.04 <sup>e</sup>            | 9.98 ± 0.24 <sup>a</sup>          |

Values in same column with different letters are significantly different (P≤0.05).

**Table S4.** Degradation of [6], [8], [10]-gingerols and formation of [6]-shogoal in ginger flavoured co-crystallized sugar cubes under storage of 33% RH at 45 °C determined by HPLC

| Storage time (days) | [6]-Gingerol (mg/100 g)    | [8]-Gingerol (mg/100 g)   | [10]-Gingerol (mg/100 g)   | [6]-Shogoal (mg/100 g)    |
|---------------------|----------------------------|---------------------------|----------------------------|---------------------------|
| 0                   | 45.57 ± 1.23 <sup>a</sup>  | 7.13 ± 1.70 <sup>a</sup>  | 7.78 ± 1.64 <sup>a</sup>   | 3.88 ± 0.64 <sup>d</sup>  |
| 15                  | 42.50 ± 4.30 <sup>a</sup>  | 7.04 ± 0.04 <sup>a</sup>  | 6.25 ± 0.23 <sup>b</sup>   | 7.57 ± 0.58 <sup>c</sup>  |
| 30                  | 34.96 ± 0.59 <sup>b</sup>  | 4.82 ± 0.21 <sup>b</sup>  | 4.43 ± 0.47 <sup>c</sup>   | 8.39 ± 0.36 <sup>c</sup>  |
| 45                  | 33.42 ± 0.55 <sup>bc</sup> | 4.76 ± 0.25 <sup>b</sup>  | 3.94 ± 0.59 <sup>cd</sup>  | 9.74 ± 0.29 <sup>b</sup>  |
| 60                  | 31.98 ± 0.58 <sup>bc</sup> | 4.11 ± 0.09 <sup>bc</sup> | 3.09 ± 0.50 <sup>cde</sup> | 11.38 ± 0.30 <sup>a</sup> |
| 75                  | 30.79 ± 1.43 <sup>c</sup>  | 3.71 ± 0.24 <sup>bc</sup> | 2.63 ± 0.43 <sup>de</sup>  | 11.67 ± 1.21 <sup>a</sup> |
| 90                  | 26.55 ± 0.54 <sup>d</sup>  | 2.84 ± 0.71 <sup>c</sup>  | 2.09 ± 0.51 <sup>e</sup>   | 11.73 ± 0.18 <sup>a</sup> |

Values in same column with different letters are significantly different (P≤0.05).

**Table S5.** Degradation of [6], [8], [10]-gingerols and formation of [6]-shogoal in ginger flavoured co-crystallized sugar cubes under storage of 63% RH at 45 °C determined by HPLC

| Storage time (days) | [6]-Gingerol (mg/100 g)   | [8]-Gingerol (mg/100 g)   | [10]-Gingerol (mg/100 g)  | [6]-Shogoal (mg/100 g)     |
|---------------------|---------------------------|---------------------------|---------------------------|----------------------------|
| 0                   | 45.57 ± 1.23 <sup>a</sup> | 7.13 ± 1.70 <sup>a</sup>  | 7.78 ± 1.64 <sup>a</sup>  | 3.88 ± 0.64 <sup>d</sup>   |
| 15                  | 42.95 ± 3.34 <sup>a</sup> | 6.46 ± 1.07 <sup>a</sup>  | 5.68 ± 0.89 <sup>b</sup>  | 5.99 ± 0.38 <sup>c</sup>   |
| 30                  | 33.70 ± 0.79 <sup>b</sup> | 4.60 ± 0.83 <sup>b</sup>  | 4.14 ± 0.78 <sup>c</sup>  | 6.44 ± 0.74 <sup>c</sup>   |
| 45                  | 32.86 ± 4.11 <sup>b</sup> | 4.034 ± 0.23 <sup>b</sup> | 3.13 ± 0.18 <sup>cd</sup> | 9.02 ± 0.50 <sup>b</sup>   |
| 60                  | 32.59 ± 0.18 <sup>b</sup> | 4.01 ± 0.79 <sup>b</sup>  | 2.77 ± 0.44 <sup>cd</sup> | 10.71 ± 1.80 <sup>ab</sup> |
| 75                  | 26.57 ± 1.37 <sup>c</sup> | 3.80 ± 0.46 <sup>b</sup>  | 2.43 ± 0.63 <sup>d</sup>  | 11.08 ± 1.58 <sup>a</sup>  |
| 90                  | 25.42 ± 0.16 <sup>c</sup> | 3.21 ± 0.09 <sup>b</sup>  | 1.92 ± 0.17 <sup>d</sup>  | 11.13 ± 0.46 <sup>a</sup>  |

Values in same column with different letters are significantly different (P≤0.05).



**Table S6.** Degradation of [6], [8], [10]-gingerols and formation of [6]-shogoal in ginger flavoured co-crystallized sugar cubes under storage of 63% RH at 45 °C determined by HPLC

| Storage time (days) | [6]-Gingerol (mg/100 g)    | [8]-Gingerol (mg/100 g)   | [10]-Gingerol (mg/100 g)  | [6]-Shogoal (mg/100 g)    |
|---------------------|----------------------------|---------------------------|---------------------------|---------------------------|
| 0                   | 45.57 ± 1.23 <sup>a</sup>  | 7.13 ± 1.70 <sup>a</sup>  | 7.78 ± 1.64 <sup>a</sup>  | 3.88 ± 0.64 <sup>c</sup>  |
| 15                  | 43.23 ± 10.13 <sup>a</sup> | 6.34 ± 0.11 <sup>ab</sup> | 6.04 ± 0.62 <sup>b</sup>  | 7.29 ± 0.40 <sup>b</sup>  |
| 30                  | 41.01 ± 1.26 <sup>a</sup>  | 5.39 ± 0.80 <sup>bc</sup> | 4.70 ± 0.93 <sup>bc</sup> | 8.01 ± 3.21 <sup>b</sup>  |
| 45                  | 32.59 ± 0.18 <sup>b</sup>  | 4.53 ± 0.57 <sup>c</sup>  | 3.91 ± 0.26 <sup>cd</sup> | 9.72 ± 0.39 <sup>ab</sup> |
| 60                  | 32.12 ± 1.28 <sup>b</sup>  | 4.46 ± 0.40 <sup>c</sup>  | 3.88 ± 0.77 <sup>cd</sup> | 10.81 ± 0.30 <sup>a</sup> |
| 75                  | 28.04 ± 3.17 <sup>bc</sup> | 3.95 ± 0.45 <sup>c</sup>  | 2.81 ± 0.80 <sup>d</sup>  | 10.84 ± 1.29 <sup>a</sup> |
| 90                  | 23.17 ± 0.41 <sup>c</sup>  | 2.54 ± 0.39 <sup>d</sup>  | 1.24 ± 0.52 <sup>e</sup>  | 11.25 ± 0.61 <sup>a</sup> |

Values in same column with different letters are significantly different (P≤0.05).
